# Supplementary material for: No genetic causal relationship between acne and prostate cancer through Mendelian randomization combined with meta-analysis
Source: Front Oncol. 2024 Sep 19;14:1460467. doi: 10.3389/fonc.2024.1460467 (PMC11446721; doi:10.3389/fonc.2024.1460467)
Supplement: Supplementary file 1 [file DataSheet1.xls]

## Sheet: Sheet1
SNP	CHR	Risk allele frequency	Effect_allele	Other_allele	OR (95% CI)	Beta	SE	P-value	F
rs11242109	5	0.4719	T	G	1.08 (1.05–1.1)	0.077	0.012	2.92e-10	60.7954
rs12373373	18	0.3977	T	C	1.08 (1.05–1.11)	0.077	0.014	3.49e-08	58.4283
rs13104688	4	0.3426	G	T	1.11 (1.08–1.13)	0.104	0.012	6.28e-16	100.425
rs1342583	13	0.5695	A	G	1.08 (1.06–1.11)	0.077	0.012	4.85e-11	59.8068
rs144908022	11	0.01025	G	A	1.61 (1.44–1.79)	0.476	0.056	2.19e-18	94.7332
rs169262	6	0.8091	C	T	1.1 (1.07–1.14)	0.095	0.016	3.24e-10	57.3464
rs17265703	3	0.1521	G	A	1.13 (1.09–1.17)	0.122	0.018	1.57e-13	79.05
rs17692425	6	0.3443	C	T	1.07 (1.05–1.1)	0.068	0.012	4.16e-08	42.9147
rs17803958	8	0.07166	T	C	1.14 (1.09–1.19)	0.131	0.022	1.13e-08	46.9415
rs258887	5	0.5439	A	C	1.07 (1.04–1.09)	0.068	0.012	2.78e-08	47.1664
rs260643	2	0.0998	A	G	1.15 (1.11–1.19)	0.14	0.018	2.93e-12	72.493
rs28470568	22	0.1448	T	G	1.11 (1.08–1.15)	0.104	0.016	1.19e-09	55.0942
rs2901000	2	0.4285	A	G	1.09 (1.07–1.12)	0.086	0.012	3.13e-14	74.5724
rs34560261	15	0.8345	C	T	1.25 (1.21–1.3)	0.223	0.018	2.51e-35	285.679
rs34381158	3	0.326	G	A	1.08 (1.05–1.11)	0.077	0.014	1.67e-09	53.5834
rs3849154	11	0.3237	T	G	1.15 (1.12–1.17)	0.14	0.011	2.22e-28	177.549
rs3773364	3	0.1574	G	A	1.12 (1.08–1.15)	0.113	0.016	1.27e-11	69.7099
rs404818	1	0.2531	T	C	1.08 (1.05–1.11)	0.077	0.014	9.76e-09	46.0838
rs4878737	9	0.2568	T	G	1.08 (1.05–1.11)	0.077	0.014	1.4e-08	46.5269
rs513398	1	0.56	A	G	1.09 (1.06–1.11)	0.086	0.012	3.69e-12	75.0346
rs6658708	1	0.527	T	G	1.08 (1.06–1.11)	0.077	0.012	6.19e-12	60.8103
rs629725	5	0.3393	T	C	1.15 (1.12–1.17)	0.14	0.011	3.5e-28	181.851
rs72803831	16	0.8875	G	A	1.15 (1.1–1.19)	0.14	0.02	2.4e-11	80.5968
rs7194305	16	0.584	A	G	1.1 (1.07–1.13)	0.095	0.014	2.18e-15	90.3441
rs6842241	4	0.8622	C	A	1.1 (1.06–1.14)	0.095	0.019	2.22e-08	44.0834
rs7312010	12	0.4064	A	G	1.1 (1.07–1.12)	0.095	0.012	9.85e-15	89.7073
rs74333950	2	0.8603	T	G	1.2 (1.16–1.24)	0.182	0.017	3.03e-23	164.626
rs8042919	15	0.1109	A	G	1.11 (1.07–1.15)	0.104	0.018	4.48e-08	43.8444
rs9398069	6	0.6127	T	C	1.08 (1.05–1.1)	0.077	0.012	1.29e-09	57.8813
rs9639838	7	0.2087	T	C	1.1 (1.07–1.13)	0.095	0.014	3.27e-11	61.3261
IVs selected from FinnGen consortium
SNP	CHR	Risk allele frequency	Effect_allele	Other_allele	OR (95% CI)	Beta	SE	P-value	F
rs11242109	5	0.4719	T	G	1.08 (1.05–1.1)	0.077	0.012	2.92e-10	70.1495
rs12373373	18	0.3977	T	C	1.08 (1.05–1.11)	0.077	0.014	3.49e-08	67.4181
rs1342583	13	0.5695	A	G	1.08 (1.06–1.11)	0.077	0.012	4.85e-11	69.0088
rs144908022	11	0.01025	G	A	1.61 (1.44–1.79)	0.476	0.056	2.19e-18	109.309
rs169262	6	0.8091	C	T	1.1 (1.07–1.14)	0.095	0.016	3.24e-10	66.1697
rs17265703	3	0.1521	G	A	1.13 (1.09–1.17)	0.122	0.018	1.57e-13	91.2128
rs17692425	6	0.3443	C	T	1.07 (1.05–1.1)	0.068	0.012	4.16e-08	49.5176
rs17803958	8	0.07166	T	C	1.14 (1.09–1.19)	0.131	0.022	1.13e-08	54.164
rs258887	5	0.5439	A	C	1.07 (1.04–1.09)	0.068	0.012	2.78e-08	54.4234
rs28470568	22	0.1448	T	G	1.11 (1.08–1.15)	0.104	0.016	1.19e-09	63.5711
rs2901000	2	0.4285	A	G	1.09 (1.07–1.12)	0.086	0.012	3.13e-14	86.0462
rs34381158	3	0.326	G	A	1.08 (1.05–1.11)	0.077	0.014	1.67e-09	61.8278
rs34560261	15	0.8345	C	T	1.25 (1.21–1.3)	0.223	0.018	2.51e-35	329.634
rs3773364	3	0.1574	G	A	1.12 (1.08–1.15)	0.113	0.016	1.27e-11	80.4356
rs3849154	11	0.3237	T	G	1.15 (1.12–1.17)	0.14	0.011	2.22e-28	204.867
rs404818	1	0.2531	T	C	1.08 (1.05–1.11)	0.077	0.014	9.76e-09	53.1744
rs513398	1	0.56	A	G	1.09 (1.06–1.11)	0.086	0.012	3.69e-12	86.5795
rs629725	5	0.3393	T	C	1.15 (1.12–1.17)	0.14	0.011	3.5e-28	209.831
rs6658708	1	0.527	T	G	1.08 (1.06–1.11)	0.077	0.012	6.19e-12	70.1666
rs6842241	4	0.8622	C	A	1.1 (1.06–1.14)	0.095	0.019	2.22e-08	50.8661
rs7194305	16	0.584	A	G	1.1 (1.07–1.13)	0.095	0.014	2.18e-15	104.245
rs72803831	16	0.8875	G	A	1.15 (1.1–1.19)	0.14	0.02	2.4e-11	92.9976
rs7312010	12	0.4064	A	G	1.1 (1.07–1.12)	0.095	0.012	9.85e-15	103.51
rs8042919	15	0.1109	A	G	1.11 (1.07–1.15)	0.104	0.018	4.48e-08	50.5904
rs9398069	6	0.6127	T	C	1.08 (1.05–1.1)	0.077	0.012	1.29e-09	66.787
rs9639838	7	0.2087	T	C	1.1 (1.07–1.13)	0.095	0.014	3.27e-11	70.7618
IVs selected from IEU OpenGWAS project
SNP	CHR	Risk allele frequency	Effect_allele	Other_allele	OR (95% CI)	Beta	SE	P-value	F
rs11242109	5	0.4719	T	G	1.08 (1.05–1.1)	0.077	0.012	2.92e-10	67.5501
rs12373373	18	0.3977	T	C	1.08 (1.05–1.11)	0.077	0.014	3.49e-08	64.92
rs13104688	4	0.3426	G	T	1.11 (1.08–1.13)	0.104	0.012	6.28e-16	111.583
rs1342583	13	0.5695	A	G	1.08 (1.06–1.11)	0.077	0.012	4.85e-11	66.4517
rs169262	6	0.8091	C	T	1.1 (1.07–1.14)	0.095	0.016	3.24e-10	63.7179
rs17265703	3	0.1521	G	A	1.13 (1.09–1.17)	0.122	0.018	1.57e-13	87.8329
rs17692425	6	0.3443	C	T	1.07 (1.05–1.1)	0.068	0.012	4.16e-08	47.6827
rs258887	5	0.5439	A	C	1.07 (1.04–1.09)	0.068	0.012	2.78e-08	52.4068
rs28470568	22	0.1448	T	G	1.11 (1.08–1.15)	0.104	0.016	1.19e-09	61.2155
rs2901000	2	0.4285	A	G	1.09 (1.07–1.12)	0.086	0.012	3.13e-14	82.8578
rs34381158	3	0.326	G	A	1.08 (1.05–1.11)	0.077	0.014	1.67e-09	59.5368
rs34560261	15	0.8345	C	T	1.25 (1.21–1.3)	0.223	0.018	2.51e-35	317.42
rs3773364	3	0.1574	G	A	1.12 (1.08–1.15)	0.113	0.016	1.27e-11	77.4551
rs3849154	11	0.3237	T	G	1.15 (1.12–1.17)	0.14	0.011	2.22e-28	197.276
rs404818	1	0.2531	T	C	1.08 (1.05–1.11)	0.077	0.014	9.76e-09	51.204
rs4878737	9	0.2568	T	G	1.08 (1.05–1.11)	0.077	0.014	1.4e-08	51.6963
rs513398	1	0.56	A	G	1.09 (1.06–1.11)	0.086	0.012	3.69e-12	83.3713
rs629725	5	0.3393	T	C	1.15 (1.12–1.17)	0.14	0.011	3.5e-28	202.056
rs6658708	1	0.527	T	G	1.08 (1.06–1.11)	0.077	0.012	6.19e-12	67.5666
rs6842241	4	0.8622	C	A	1.1 (1.06–1.14)	0.095	0.019	2.22e-08	48.9813
rs7194305	16	0.584	A	G	1.1 (1.07–1.13)	0.095	0.014	2.18e-15	100.382
rs72803831	16	0.8875	G	A	1.15 (1.1–1.19)	0.14	0.02	2.4e-11	89.5516
rs7312010	12	0.4064	A	G	1.1 (1.07–1.12)	0.095	0.012	9.85e-15	99.6743
rs74333950	2	0.8603	T	G	1.2 (1.16–1.24)	0.182	0.017	3.03e-23	182.917
rs8042919	15	0.1109	A	G	1.11 (1.07–1.15)	0.104	0.018	4.48e-08	48.7158
rs9398069	6	0.6127	T	C	1.08 (1.05–1.1)	0.077	0.012	1.29e-09	64.3123
rs9639838	7	0.2087	T	C	1.1 (1.07–1.13)	0.095	0.014	3.27e-11	68.1398
IVs selected from UK Biobank
SNP	CHR	Risk allele frequency	Effect_allele	Other_allele	OR (95% CI)	Beta	SE	P-value	F
rs11242109	5	0.4719	T	G	1.08 (1.05–1.1)	0.077	0.012	2.92e-10	60.7954
rs12373373	18	0.3977	T	C	1.08 (1.05–1.11)	0.077	0.014	3.49e-08	58.4283
rs13104688	4	0.3426	G	T	1.11 (1.08–1.13)	0.104	0.012	6.28e-16	100.425
rs144908022	11	0.01025	G	A	1.61 (1.44–1.79)	0.476	0.056	2.19e-18	94.7332
rs1342583	13	0.5695	A	G	1.08 (1.06–1.11)	0.077	0.012	4.85e-11	59.8068
rs169262	6	0.8091	C	T	1.1 (1.07–1.14)	0.095	0.016	3.24e-10	57.3464
rs17265703	3	0.1521	G	A	1.13 (1.09–1.17)	0.122	0.018	1.57e-13	79.05
rs17803958	8	0.07166	T	C	1.14 (1.09–1.19)	0.131	0.022	1.13e-08	46.9415
rs17692425	6	0.3443	C	T	1.07 (1.05–1.1)	0.068	0.012	4.16e-08	42.9147
rs28470568	22	0.1448	T	G	1.11 (1.08–1.15)	0.104	0.016	1.19e-09	55.0942
rs260643	2	0.0998	A	G	1.15 (1.11–1.19)	0.14	0.018	2.93e-12	72.493
rs258887	5	0.5439	A	C	1.07 (1.04–1.09)	0.068	0.012	2.78e-08	47.1664
rs2901000	2	0.4285	A	G	1.09 (1.07–1.12)	0.086	0.012	3.13e-14	74.5724
rs34560261	15	0.8345	C	T	1.25 (1.21–1.3)	0.223	0.018	2.51e-35	285.679
rs34381158	3	0.326	G	A	1.08 (1.05–1.11)	0.077	0.014	1.67e-09	53.5834
rs3849154	11	0.3237	T	G	1.15 (1.12–1.17)	0.14	0.011	2.22e-28	177.549
rs3773364	3	0.1574	G	A	1.12 (1.08–1.15)	0.113	0.016	1.27e-11	69.7099
rs404818	1	0.2531	T	C	1.08 (1.05–1.11)	0.077	0.014	9.76e-09	46.0838
rs4878737	9	0.2568	T	G	1.08 (1.05–1.11)	0.077	0.014	1.4e-08	46.5269
rs513398	1	0.56	A	G	1.09 (1.06–1.11)	0.086	0.012	3.69e-12	75.0346
rs629725	5	0.3393	T	C	1.15 (1.12–1.17)	0.14	0.011	3.5e-28	181.851
rs6658708	1	0.527	T	G	1.08 (1.06–1.11)	0.077	0.012	6.19e-12	60.8103
rs6842241	4	0.8622	C	A	1.1 (1.06–1.14)	0.095	0.019	2.22e-08	44.0834
rs72803831	16	0.8875	G	A	1.15 (1.1–1.19)	0.14	0.02	2.4e-11	80.5968
rs7194305	16	0.584	A	G	1.1 (1.07–1.13)	0.095	0.014	2.18e-15	90.3441
rs7312010	12	0.4064	A	G	1.1 (1.07–1.12)	0.095	0.012	9.85e-15	89.7073
rs74333950	2	0.8603	T	G	1.2 (1.16–1.24)	0.182	0.017	3.03e-23	164.626
rs8042919	15	0.1109	A	G	1.11 (1.07–1.15)	0.104	0.018	4.48e-08	43.8444
rs9639838	7	0.2087	T	C	1.1 (1.07–1.13)	0.095	0.014	3.27e-11	61.3261
rs9398069	6	0.6127	T	C	1.08 (1.05–1.1)	0.077	0.012	1.29e-09	57.8813
IVs selected from European Bioinformatics Institute
